# Supplementary material
Source: Springer Nature journal article supplement (https://www.springermedizin.de/resource/supplementary/12891_2008_560_MOESM1_ESM.pdf/9511338)

FREQUENCY

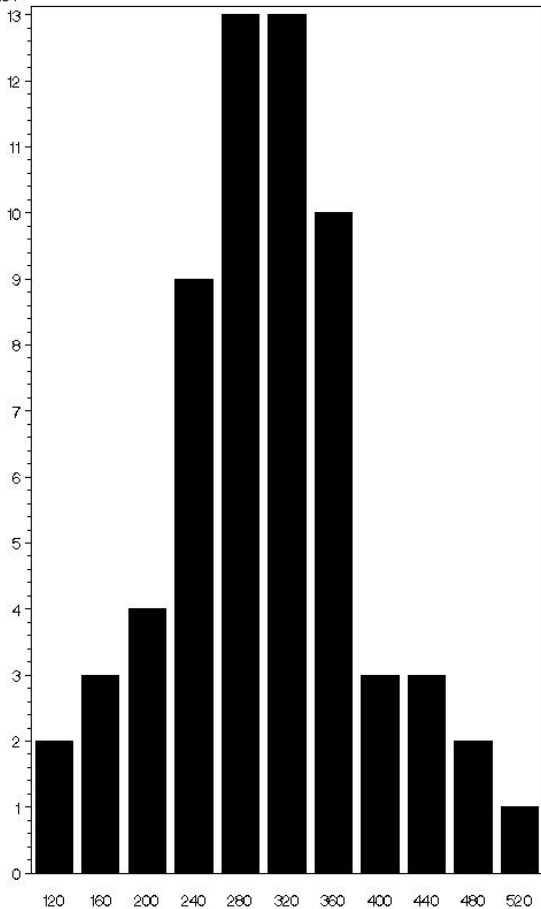

Meters walked in 6 minutes

Supplement: MOESM1 [file 9511338]
